# Supplementary material for: A mechanistic study of the photodegradation of herbicide 2,4,5-trichlorophenoxyacetic acid in aqueous solution
Source: Royal Society of Chemistry journal article supplement (doi:10.1039/c2pp25204j), 2012-10-04
Supplement: c2pp25204j.pdf [file c2pp25204j.pdf]

## Electronic Supplementary Information (ESI)

### "A mechanistic study of the photodegradation of Herbicide 2,4,5-Trichlorophenoxyacetic Acid in Aqueous Solution"

Maria P. Yurkova, Ivan P. Pozdnyakov, Victor F. Plyusnin, Vyacheslav P. Grivin, Nikolay M. Bazhin<sup>a</sup>, Alexandr I. Kruppa, Tatiana A. Maksimova

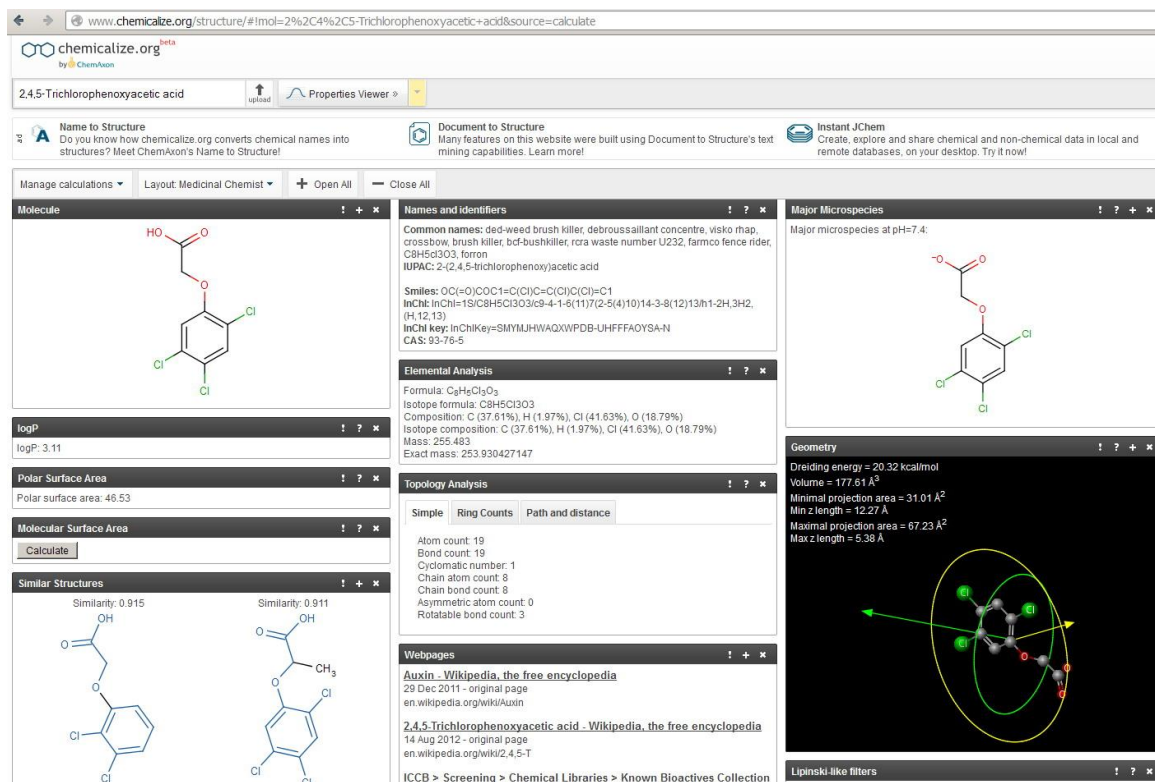

Figure S1. Estimation of 2,4,5-T diameter

<http://www.chemicalize.org/structure/#!mol=2%2C4%2C5-Trichlorophenoxyacetic+acid&source=calculate>

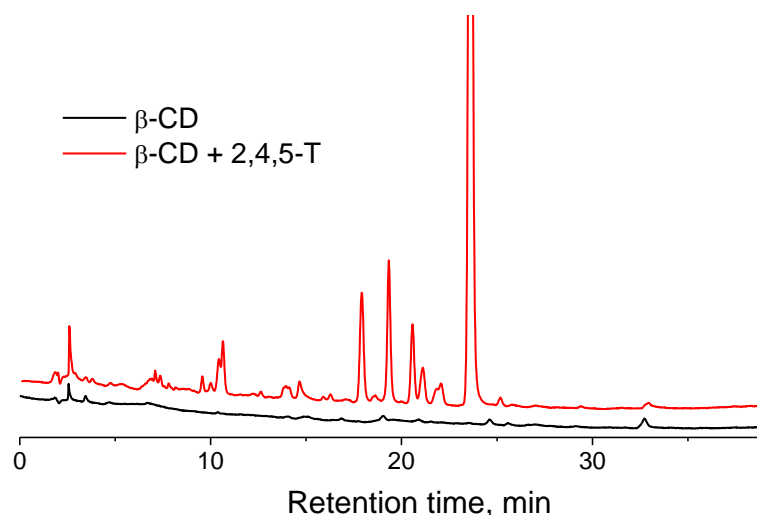

Figure S2. HPLC chromatograms of  $\beta$ -CD and  $\beta$ -CD + 2,4,5-T after 14 hours of photolysis at 254 nm in air-equilibrated aqueous solution (UV detector wavelength: 280 nm).  $[2,4,5-T] = 8 \times 10^{-4}$  M,  $[\beta\text{-CD}] = 5 \times 10^{-3}$  M, pH 9.

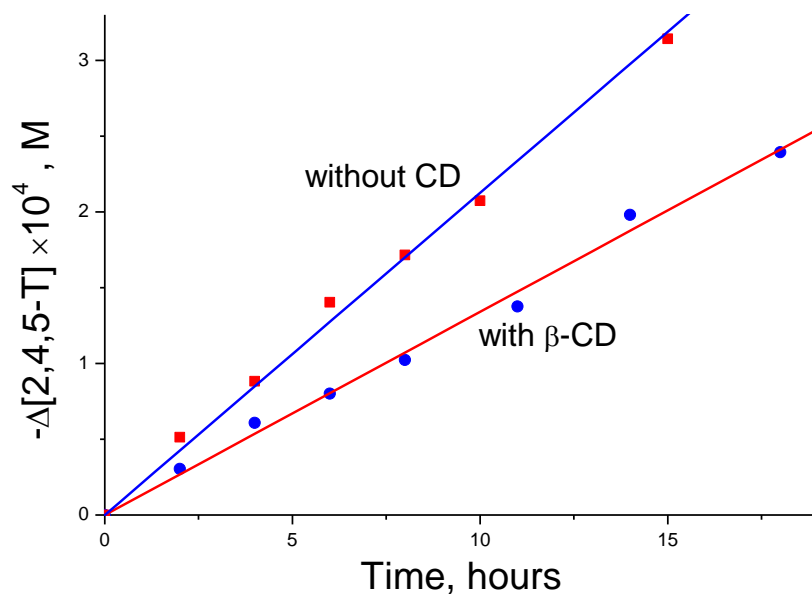

**Figure S3. Dependence of 2,4,5-T photodegradation on irradiation time with and without  $\beta$ -CD.**
